# Supplementary material for: Identification of Soybean Yield QTL in Irrigated and Rain-Fed Environments
Source: MDPI journal article supplement (doi:10.3390/agronomy11112207), 2021-10-30
Supplement: s1 [file s1]

**Table S1.** Changes in weather data collected in Athens, Georgia in year 2000.

| Month   | Avg<br>5 cm Soil<br>Temperature<br>(°C) | Avg<br>10 cm Soil<br>Temperature<br>(°C) | Avg<br>20 cm Soil<br>Temperature<br>(°C) | Avg<br>Vapor Pressure<br>Deficit<br>(kPa) | Evapotranspiration<br>(mm) | Max<br>Air<br>Temperature<br>(°C) | Min<br>Air<br>Temperature<br>(°C) | Avg<br>Air<br>Temperature<br>(°C) | Avg<br>Relative<br>Humidity<br>(%) | Avg<br>Vapor<br>Pressure<br>(kPa) | Total<br>Solar<br>Radiation<br>(MJ/m <sup>2</sup> ) | Total Par<br>(Einstein/m <sup>2</sup> ) | Total Rain<br>(mm) |
|---------|-----------------------------------------|------------------------------------------|------------------------------------------|-------------------------------------------|----------------------------|-----------------------------------|-----------------------------------|-----------------------------------|------------------------------------|-----------------------------------|-----------------------------------------------------|-----------------------------------------|--------------------|
| 1       | 7.70                                    | 8.15                                     | 7.95                                     | 0.24                                      | 0.57                       | 10.46                             | 0.89                              | 5.57                              | 77.23                              | 0.76                              | 7.09                                                | 10.91                                   | 3.86               |
| 2       | 8.95                                    | 8.90                                     | 8.53                                     | 0.35                                      | 1.37                       | 16.33                             | 2.68                              | 9.26                              | 75.21                              | 0.91                              | 11.52                                               | 17.66                                   | 1.65               |
| 3       | 14.96                                   | 13.87                                    | 13.47                                    | 0.43                                      | 2.16                       | 20.39                             | 7.02                              | 13.70                             | 77.52                              | 1.23                              | 13.86                                               | 21.39                                   | 2.56               |
| 4       | 17.99                                   | 16.49                                    | 16.00                                    | 0.44                                      | 2.91                       | 21.38                             | 7.77                              | 14.77                             | 79.66                              | 1.33                              | 16.77                                               | 25.28                                   | 1.50               |
| 5       | 25.28                                   | 22.85                                    | 22.09                                    | 0.73                                      | 4.52                       | 29.32                             | 15.57                             | 22.28                             | 78.16                              | 2.06                              | 21.13                                               | 33.26                                   | 1.06               |
| 6       | 29.05                                   | 26.50                                    | 25.65                                    | 0.84                                      | 4.76                       | 31.54                             | 18.59                             | 24.70                             | 78.76                              | 2.38                              | 20.82                                               | 30.23                                   | 2.08               |
| 7       | 31.38                                   | 28.65                                    | 27.78                                    | 0.94                                      | 4.59                       | 32.99                             | 20.36                             | 26.15                             | 78.75                              | 2.57                              | 19.48                                               | 29.27                                   | 2.03               |
| 8       | 30.80                                   | 28.41                                    | 27.50                                    | 0.62                                      | 4.12                       | 31.36                             | 19.88                             | 25.16                             | 85.47                              | 2.68                              | 18.26                                               | 27.18                                   | 2.67               |
| 9       | 26.55                                   | 24.69                                    | 23.86                                    | 0.22                                      | 2.60                       | 25.99                             | 16.14                             | 20.63                             | 92.39                              | 2.29                              | 13.77                                               | 19.39                                   | 3.50               |
| 10      | 22.20                                   | 20.76                                    | 20.06                                    | 0.49                                      | 2.21                       | 24.62                             | 9.87                              | 16.78                             | 80.76                              | 1.54                              | 14.62                                               | 19.46                                   | 0.15               |
| 11      | 14.76                                   | 14.45                                    | 13.96                                    | 0.21                                      | 0.73                       | 15.62                             | 4.92                              | 10.03                             | 85.70                              | 1.12                              | 7.62                                                | 11.59                                   | 4.39               |
| 12      | 6.64                                    | 6.69                                     | 6.41                                     | 0.13                                      | 0.25                       | 7.50                              | -2.53                             | 2.04                              | 82.94                              | 0.61                              | 6.39                                                | 9.69                                    | 2.70               |
| total   | <b>7217.61</b>                          | <b>6732.88</b>                           | <b>6515.01</b>                           | <b>172.50</b>                             | <b>940.65</b>              | <b>8165.41</b>                    | <b>3703.70</b>                    | <b>5834.32</b>                    | <b>29662.15</b>                    | <b>594.52</b>                     | <b>5229.28</b>                                      | <b>7792.57</b>                          | <b>857.74</b>      |
| Average | <b>19.72</b>                            | <b>18.40</b>                             | <b>17.80</b>                             | <b>0.47</b>                               | <b>2.57</b>                | <b>22.31</b>                      | <b>10.12</b>                      | <b>15.94</b>                      | <b>81.04</b>                       | <b>1.62</b>                       | <b>14.29</b>                                        | <b>21.29</b>                            | <b>2.34</b>        |

**Table S2.** Changes in weather data collected in Athens, Georgia in year 2001.

| Month   | Avg<br>5 cm Soil<br>Temperature<br>(°C) | Avg<br>10 cm Soil<br>Temperature<br>(°C) | Avg<br>20 cm Soil<br>Temperature<br>(°C) | Avg<br>Vapor Pressure<br>Deficit<br>(kPa) | Evapotranspiration<br>(mm) | Max<br>Air<br>Temperature<br>(°C) | Min<br>Air<br>Temperature<br>(°C) | Avg<br>Air<br>Temperature<br>(°C) | Avg<br>Relative<br>Humidity<br>(%) | Avg<br>Vapor<br>Pressure<br>(kPa) | Total<br>Solar<br>Radiation<br>(MJ/m <sup>2</sup> ) | Total Par<br>(Einstein/m <sup>2</sup> ) | Total Rain<br>(mm) |
|---------|-----------------------------------------|------------------------------------------|------------------------------------------|-------------------------------------------|----------------------------|-----------------------------------|-----------------------------------|-----------------------------------|------------------------------------|-----------------------------------|-----------------------------------------------------|-----------------------------------------|--------------------|
| 1       | 6.87                                    | 6.23                                     | 5.80                                     | 0.25                                      | 0.75                       | 11.51                             | -0.03                             | 5.41                              | 76.09                              | 0.71                              | 9.13                                                | 12.12                                   | 2.73               |
| 2       | 11.53                                   | 10.24                                    | 9.67                                     | 0.26                                      | 1.37                       | 15.96                             | 4.15                              | 9.90                              | 81.75                              | 1.04                              | 11.42                                               | 12.85                                   | 2.85               |
| 3       | 13.12                                   | 11.82                                    | 11.19                                    | 0.36                                      | 2.20                       | 15.77                             | 4.47                              | 10.04                             | 74.04                              | 0.94                              | 15.84                                               | 18.01                                   | 6.86               |
| 4       | 19.74                                   | 17.45                                    | 16.55                                    | 0.47                                      | 3.81                       | 23.41                             | 10.77                             | 17.05                             | 79.95                              | 1.59                              | 20.84                                               | 24.34                                   | 1.54               |
| 5       | 25.35                                   | 22.84                                    | 21.88                                    | 0.60                                      | 4.74                       | 26.99                             | 14.14                             | 20.45                             | 80.94                              | 1.90                              | 23.06                                               | 28.43                                   | 3.48               |
| 6       | 27.86                                   | 25.86                                    | 24.86                                    | 0.30                                      | 4.67                       | 28.50                             | 18.74                             | 22.97                             | 91.81                              | 2.56                              | 21.16                                               | 25.66                                   | 4.69               |
| 7       | 29.84                                   | 29.05                                    | 28.52                                    | 0.39                                      | 5.04                       | 30.72                             | 20.43                             | 24.92                             | 90.56                              | 2.83                              | 22.02                                               | 26.73                                   | 7.33               |
| 8       | 30.32                                   | 35.03                                    | 29.12                                    | 0.26                                      | 4.35                       | 30.48                             | 20.56                             | 24.78                             | 93.50                              | 2.92                              | 19.62                                               | 24.61                                   | 1.56               |
| 9       | 26.92                                   | 35.62                                    | 26.32                                    | 0.37                                      | 3.42                       | 27.05                             | 15.42                             | 20.73                             | 87.65                              | 2.18                              | 18.21                                               | 22.84                                   | 1.75               |
| 10      | 18.09                                   | 18.62                                    | 18.48                                    | 0.43                                      | 2.38                       | 22.63                             | 7.92                              | 14.96                             | 79.64                              | 1.40                              | 16.65                                               | 21.90                                   | 0.16               |
| 11      | 15.18                                   | 15.25                                    | 15.46                                    | 0.48                                      | 1.38                       | 21.86                             | 7.91                              | 14.49                             | 75.06                              | 1.26                              | 12.35                                               | 15.20                                   | 0.64               |
| 12      | 10.84                                   | 11.18                                    | 11.63                                    | 0.25                                      | 0.46                       | 15.86                             | 4.30                              | 9.50                              | 80.22                              | 1.03                              | 9.56                                                | 12.44                                   | 1.67               |
| total   | <b>7180.75</b>                          | <b>7290.05</b>                           | <b>6691.76</b>                           | <b>134.66</b>                             | <b>1054.37</b>             | <b>8244.26</b>                    | <b>3927.01</b>                    | <b>5946.57</b>                    | <b>30147.78</b>                    | <b>620.31</b>                     | <b>6089.26</b>                                      | <b>7472.25</b>                          | <b>1075.91</b>     |
| Average | <b>19.67</b>                            | <b>19.97</b>                             | <b>18.33</b>                             | <b>0.37</b>                               | <b>2.89</b>                | <b>22.59</b>                      | <b>10.76</b>                      | <b>16.29</b>                      | <b>82.60</b>                       | <b>1.70</b>                       | <b>16.68</b>                                        | <b>20.47</b>                            | <b>2.95</b>        |
